# Supplementary material for: Y-chromosome genetic diversity of Bos indicus cattle in close proximity to the centre of domestication
Source: PubMed Central journal article supplement (PMC7305206; doi:10.1038/s41598-020-66133-3), 2020-06-19
Supplement: 41598_2020_66133_MOESM1_ESM.pdf [file 41598_2020_66133_MOESM1_ESM.pdf]

## Supplementary information for

### **Y-chromosome genetic diversity of *Bos indicus* cattle in close proximity to the centre of domestication**

**Indrajit Ganguly<sup>1\*</sup>, C Jeevan<sup>2</sup>, Sanjeev Singh<sup>1</sup>, S P Dixit<sup>1</sup>, Monika Sodhi<sup>1</sup>, Ashish Ranjan<sup>2</sup>, Suchit Kumar<sup>2</sup> & Aurodh Sharma<sup>1</sup>**

Affiliations:

<sup>1</sup>ICAR-National Bureau of Animal Genetic Resources, Karnal, 132001, Haryana, India.

<sup>2</sup>ICAR-National Dairy Research Institute, Karnal, 132001, Haryana, India.

\*To whom correspondence and request should be addressed (e-mail: [indrajit.ganguly@icar.gov.in](mailto:indrajit.ganguly@icar.gov.in))

**The PDF file includes:**

**Supplementary Table S1:** Primer sequences,  $T_a$ , fluorescence label and their allelic range, repeat motif and ratio of multiplexing for Y-chromosome STR loci.

**Supplementary Table S2:** Y-chromosome microsatellite allele frequencies of 19 Indian cattle breeds.

**Supplementary Table S3:** Y-haplotypes defined by 6 Y-chromosome microsatellites and their classification into haplogroup (s) by screening Y-specific markers ZFY9 (C/T), DDX3Y1 (C/T) and UTY19 (C/A).

**Supplementary Table S4:** Pairwise  $F_{ST}$  values (values in bold are statistically significant at level 5%) and average pairwise  $F_{ST}$  per breed ( $\pm$  standard deviation).

**Supplementary Fig. S1:** Major Y-chromosome haplotypes identified in Indian native cattle breeds.

**Supplementary Fig. S2:** Analysis of USP9Y marker to differentiate Y1, Y2 and Y3 haplogroups using *Ssp* I PCR-RFLP.

**Supplementary Fig. S3:** PCA analysis based on Y-chromosome haplotype frequencies of all breeds.

**Supplementary Fig. S4:** PCA analysis based on Y-chromosome haplotype frequencies of remaining breeds after removal of Gir and Khillar.

**Supplementary Table S1:** Primer sequences, Ta, fluorescence label and their allelic range, repeat motif and ratio of multiplexing for Y chromosome STR loci.

| Sl.No. | Locus Name/ Primer name | Primer sequence (5'-3')  | Label | Ta* (°C) | Reference                                     | Allelic range | Repeat motif                                               | Ratio of Multiplexing |
|--------|-------------------------|--------------------------|-------|----------|-----------------------------------------------|---------------|------------------------------------------------------------|-----------------------|
| 1      | INRA189-F               | TACACGCATGTCCTTGTTCGG    | Fam   | 58       | Kappes <i>et al.</i> (1997) <sup>1</sup>      | 68–124        | (TG) <sub>22</sub>                                         | 1:2                   |
|        | INRA189-R               | CTCTGCATCTGTCCTGGACTGG   | -     |          |                                               |               |                                                            |                       |
| 2      | BM861-F                 | TTGAGCCACCTGGAAAGC       | Ned   | 62       | Bishop <i>et al.</i> (1994) <sup>2</sup>      | 144-158       | (GT) <sub>6</sub> C (TG) <sub>10</sub>                     |                       |
|        | BM861-R                 | CAAGCGGTTGGTTCAGATG      | -     |          |                                               |               |                                                            |                       |
| 3      | DDX3Y1STR-F             | TGAACCACTAGGGAGGTCATC    | Fam   | 58       | Götherström <i>et al.</i> (2005) <sup>3</sup> | 249           | (TA) <sub>9</sub> (TC) <sub>9</sub>                        |                       |
|        | DDX3Y1STR-R             | TTCCAATTTAGCTGTGGTTATCTG | -     |          |                                               |               |                                                            |                       |
| 4      | UMN0103-F               | ACACAGAGTATTCACCTGAG     | Fam   | 58       | Liu <i>et al.</i> (2003) <sup>4</sup>         | 124–136       | (CA) <sub>22</sub>                                         |                       |
|        | UMN0103-R               | ATTTACCTGGGTCAAAGCAC     | -     |          |                                               |               |                                                            |                       |
| 5      | UMN0307-F               | GATACAGCTGAGTGACTAAC     | Vic   | 58       | Liu <i>et al.</i> (2003) <sup>4</sup>         | 101–162       | (CA) <sub>18</sub>                                         |                       |
|        | UMN0307-R               | GTGCAGACATCTGAGCTGTG     | -     |          |                                               |               |                                                            |                       |
| 6      | UMN0504-F               | AGGCCATCTGCATAGTGAAG     | Ned   | 58       | Liu <i>et al.</i> (2003) <sup>4</sup>         | 106–144       | (CT) <sub>2</sub> GT(CT) <sub>3</sub><br>(GT) <sub>2</sub> |                       |
|        | UMN0504-R               | TGCTGGACTGCTCATCTCTG     | -     |          |                                               |               |                                                            |                       |

\*Ta used in present study

**Supplementary Table S2: Y- chromosome microsatellite allele frequencies of 19 Indian cattle breeds.**

| Marker  | Length (bp) | BREED    |           |          |          |           |           |         |          |           |           |           |           |          |           |           |          |          |         |          |
|---------|-------------|----------|-----------|----------|----------|-----------|-----------|---------|----------|-----------|-----------|-----------|-----------|----------|-----------|-----------|----------|----------|---------|----------|
|         |             | DAG<br>3 | GIR<br>56 | HAR<br>6 | KGM<br>7 | KNK<br>15 | KHL<br>20 | KV<br>3 | MG<br>14 | MWT<br>16 | NGR<br>17 | NMR<br>16 | ONG<br>11 | PNG<br>7 | RAT<br>22 | RSD<br>17 | SW<br>52 | TP<br>14 | VC<br>3 | KHG<br>2 |
| UMN0103 | 114,116     | 0.33     | 0         | 0        | 0        | 0         | 0.1       | 0       | 0        | 0         | 0         | 0         | 0         | 0        | 0         | 0         | 0        | 0        | 0       | 0        |
|         | 114,124     | 0.67     | 0         | 0        | 1        | 0         | 0.8       | 0.67    | 0.29     | 0         | 0         | 1         | 0         | 0.14     | 0.05      | 0.65      | 0        | 0        | 0       | 0.5      |
|         | 116,122     | 0        | 0.02      | 1        | 0        | 0.87      | 0.05      | 0       | 0        | 0.81      | 0.88      | 0         | 0         | 0        | 0.05      | 0         | 0        | 0.29     | 0       | 0.5      |
|         | 116,124     | 0        | 0.98      | 0        | 0        | 0.07      | 0.05      | 0.333   | 0.71     | 0.19      | 0.12      | 0         | 1         | 0.86     | 0.91      | 0.35      | 1        | 0.71     | 1       | 0        |
|         | 124,124     | 0        | 0         | 0        | 0        | 0.07      | 0         | 0       | 0        | 0         | 0         | 0         | 0         | 0        | 0         | 0         | 0        | 0        | 0       | 0        |
| UMN0307 | 145         | 0        | 0.02      | 0        | 0        | 0         | 0         | 0       | 0        | 0         | 0         | 0         | 0         | 0        | 0         | 0         | 0        | 0        | 0       | 0        |
|         | 149         | 0.33     | 0.98      | 1        | 0        | 0.93      | 0.15      | 0.67    | 0.36     | 1         | 1         | 0.25      | 1         | 0.86     | 0.96      | 1         | 1        | 0.93     | 1       | 1        |
|         | 151         | 0.67     | 0         | 0        | 1        | 0         | 0.85      | 0.33    | 0.64     | 0         | 0         | 0.75      | 0         | 0        | 0.05      | 0         | 0        | 0.07     | 0       | 0        |
|         | 153         | 0        | 0         | 0        | 0        | 0         | 0         | 0       | 0        | 0         | 0         | 0         | 0         | 0.14     | 0         | 0         | 0        | 0        | 0       | 0        |
|         | 155         | 0        | 0         | 0        | 0        | 0.07      | 0         | 0       | 0        | 0         | 0         | 0         | 0         | 0        | 0         | 0         | 0        | 0        | 0       | 0        |
| UMN0504 | 144         | 1        | 0.96      | 1        | 1        | 1         | 1         | 1       | 1        | 1         | 1         | 1         | 1         | 1        | 1         | 1         | 1        | 1        | 1       | 1        |
|         | 148         | 0        | 0.02      | 0        | 0        | 0         | 0         | 0       | 0        | 0         | 0         | 0         | 0         | 0        | 0         | 0         | 0        | 0        | 0       | 0        |
|         | 150         | 0        | 0.02      | 0        | 0        | 0         | 0         | 0       | 0        | 0         | 0         | 0         | 0         | 0        | 0         | 0         | 0        | 0        | 0       | 0        |
| BM861   | 156         | 1        | 1         | 1        | 1        | 1         | 0.2       | 1       | 1        | 1         | 1         | 1         | 1         | 1        | 1         | 1         | 1        | 0.93     | 1       | 1        |
|         | 158         | 0        | 0         | 0        | 0        | 0         | 0.8       | 0       | 0        | 0         | 0         | 0         | 0         | 0        | 0         | 0         | 0        | 0.07     | 0       | 0        |
| INRA189 | 88          | 1        | 1         | 1        | 1        | 1         | 0.95      | 1       | 1        | 1         | 1         | 1         | 1         | 1        | 1         | 1         | 1        | 1        | 1       | 1        |
|         | 90          | 0        | 0         | 0        | 0        | 0         | 0.05      | 0       | 0        | 0         | 0         | 0         | 0         | 0        | 0         | 0         | 0        | 0        | 0       | 0        |
| DDX3Y1  | 245         | 1        | 1         | 1        | 1        | 1         | 1         | 1       | 1        | 1         | 1         | 1         | 1         | 1        | 1         | 1         | 1        | 1        | 1       | 1        |

DNG: Dangi, GIR: Gir, HR: Haryana, KGM: Kangayam, KNK: Kankrej, KHL: Khillar, KV: Krishna Valley, MG: Malnad Gidda, MWT: Mewati, NGR: Nagori, NMR: Nimari, ONG: Ongole, PNG: Punganur, RAT: Rathi, RSD: Red Sindhi, SW: Sahiwal, TP: Tharparkar, VC: Vechur; KHG: Kherigarh

**Supplementary Table S3:** Y -haplotypes defined by 6 Y-chromosome microsatellites and their classification into haplogroup (s) by screening Y-specific markers ZFY9 (C/T), DDX3Y1 (C/T) and UTY19 (C/A).

| Haplotype<br>( <i>Common nomenclature</i> ) | STR(s) |       |         |         |         |         |     | Ginja <i>et al.</i> (2019) <sup>5</sup> | Ginja <i>et al.</i> (2010) <sup>6</sup> |
|---------------------------------------------|--------|-------|---------|---------|---------|---------|-----|-----------------------------------------|-----------------------------------------|
|                                             | DDX3Y1 | BM861 | INRA189 | UMN0103 | UMN0307 | UMN0504 |     |                                         |                                         |
| H1Y3                                        | 245    | 158   | 88      | 114/116 | 149     | 144     | -   | -                                       |                                         |
| H2Y3                                        | 245    | 156   | 88      | 114/116 | 151     | 144     | -   | -                                       |                                         |
| H3Y3                                        | 245    | 158   | 88      | 114/116 | 151     | 144     | -   | -                                       |                                         |
| H4Y3*+                                      | 245    | 156   | 88      | 114/124 | 149     | 144     | H1  | -                                       |                                         |
| H5Y3                                        | 245    | 156   | 88      | 114/124 | 151     | 144     | -   | -                                       |                                         |
| H6Y3                                        | 245    | 158   | 88      | 114/124 | 151     | 144     | -   | -                                       |                                         |
| H7Y3                                        | 245    | 156   | 88      | 124/124 | 155     | 144     | -   | -                                       |                                         |
| H8Y3                                        | 245    | 156   | 88      | 114/124 | 153     | 144     | -   | -                                       |                                         |
| <b>H9Y3*+</b>                               | 245    | 156   | 88      | 116/122 | 149     | 144     | H2  | <b>H9Y3</b>                             |                                         |
| H10Y3                                       | 245    | 158   | 88      | 116/122 | 149     | 144     | -   | -                                       |                                         |
| H11Y3                                       | 245    | 156   | 88      | 116/122 | 149     | 150     | -   | -                                       |                                         |
| H12Y3                                       | 245    | 156   | 88      | 116/124 | 145     | 144     | -   | -                                       |                                         |
| H13Y3*+                                     | 245    | 156   | 88      | 116/124 | 151     | 144     | H4  | -                                       |                                         |
| H14Y3                                       | 245    | 158   | 88      | 116/124 | 149     | 144     | -   | -                                       |                                         |
| H15Y3                                       | 245    | 156   | 88      | 116/124 | 149     | 148     | -   | -                                       |                                         |
| <b>H18Y3*+</b>                              | 245    | 156   | 88      | 116/124 | 149     | 144     | H3  | <b>H18Y3</b>                            |                                         |
| H19Y3**                                     | 245    | 156   | 88      | 118/122 | 149     | 144     | H7  | H19Y3                                   |                                         |
| H20Y3**                                     | 245    | 156   | 88      | 118/124 | 149     | 144     | H8  | H20Y3                                   |                                         |
| H21Y3**                                     | 245    | 156   | 88      | 122/130 | 149     | 144     | H9  | H21Y3                                   |                                         |
| H22Y3*+                                     | 245    | 156   | 90      | 114/124 | 151     | 144     | H10 | H22Y3                                   |                                         |
| H16Y3 <sup>##</sup>                         | 245    | 156   | 88      | 116/124 | 153     | -       | H5  | -                                       |                                         |
| H17Y3 <sup>##</sup>                         | 245    | 156   | 88      | 116/126 | 149     | -       | H6  | -                                       |                                         |
| H23Y3 <sup>##</sup>                         | 245    | 156   | 90      | 114/126 | 151     | -       | H11 | -                                       |                                         |
| H24Y3 <sup>##</sup>                         | 245    | 156   | 92      | 116/124 | 149     | -       | H12 | -                                       |                                         |

\*\* Reported in American Creole cattle<sup>5,6</sup> but not observed in the present study; \*+ Observed in present study and also reported earlier<sup>5,6</sup>; ## Observed only in African Zebu<sup>5</sup>; Bold indicates most common indicine Y-haplotype; Principal haplogroup-Y3 has been confirmed by PCR-RFLP of USP9Y marker.

**Supplementary Table S4:** Pairwise  $F_{ST}$  values (values in bold are statistically significant at level 5%) and average pairwise  $F_{ST}$  per breed ( $\pm$  standard deviation).

| BREED                              | DNG    | GIR    | HR     | KGM   | KNK   | KHL   | KV     | MG    | MWT   | NGR   | NMR   | ONG    | PNG    | RAT    | RSD   | SW    | TP     | VC    | KHG   |
|------------------------------------|--------|--------|--------|-------|-------|-------|--------|-------|-------|-------|-------|--------|--------|--------|-------|-------|--------|-------|-------|
| <b>DNG</b>                         |        |        |        |       |       |       |        |       |       |       |       |        |        |        |       |       |        |       |       |
| <b>GIR</b>                         | 0.812  |        |        |       |       |       |        |       |       |       |       |        |        |        |       |       |        |       |       |
| <b>HR</b>                          | 0.676  | 0.907  |        |       |       |       |        |       |       |       |       |        |        |        |       |       |        |       |       |
| <b>KGM</b>                         | 0.523  | 0.908  | 1.000  |       |       |       |        |       |       |       |       |        |        |        |       |       |        |       |       |
| <b>KNK</b>                         | 0.577  | 0.848  | -0.049 | 0.827 |       |       |        |       |       |       |       |        |        |        |       |       |        |       |       |
| <b>KHI</b>                         | 0.166  | 0.710  | 0.535  | 0.453 | 0.514 |       |        |       |       |       |       |        |        |        |       |       |        |       |       |
| <b>KV</b>                          | -0.286 | 0.669  | 0.676  | 0.523 | 0.565 | 0.166 |        |       |       |       |       |        |        |        |       |       |        |       |       |
| <b>MG</b>                          | 0.104  | 0.548  | 0.541  | 0.403 | 0.507 | 0.262 | 0.044  |       |       |       |       |        |        |        |       |       |        |       |       |
| <b>MWT</b>                         | 0.518  | 0.801  | 0.029  | 0.780 | 0.000 | 0.487 | 0.479  | 0.451 |       |       |       |        |        |        |       |       |        |       |       |
| <b>NGR</b>                         | 0.621  | 0.847  | 0.000  | 0.846 | 0.000 | 0.539 | 0.601  | 0.528 | 0.000 |       |       |        |        |        |       |       |        |       |       |
| <b>NMR</b>                         | 0.101  | 0.817  | 0.722  | 0.104 | 0.670 | 0.357 | 0.101  | 0.296 | 0.638 | 0.692 |       |        |        |        |       |       |        |       |       |
| <b>ONG</b>                         | 0.791  | -0.034 | 1.000  | 1.000 | 0.842 | 0.592 | 0.641  | 0.408 | 0.768 | 0.850 | 0.768 |        |        |        |       |       |        |       |       |
| <b>PNG</b>                         | 0.483  | 0.037  | 0.846  | 0.857 | 0.717 | 0.460 | 0.242  | 0.235 | 0.629 | 0.731 | 0.640 | 0.069  |        |        |       |       |        |       |       |
| <b>RAT</b>                         | 0.676  | -0.006 | 0.856  | 0.861 | 0.766 | 0.576 | 0.465  | 0.369 | 0.749 | 0.803 | 0.715 | -0.169 | -0.027 |        |       |       |        |       |       |
| <b>RSD</b>                         | 0.176  | 0.665  | 0.664  | 0.676 | 0.615 | 0.414 | -0.003 | 0.319 | 0.564 | 0.632 | 0.471 | 0.570  | 0.413  | 0.530  |       |       |        |       |       |
| <b>SW</b>                          | 0.946  | 0.016  | 1.000  | 1.000 | 0.936 | 0.785 | 0.896  | 0.677 | 0.899 | 0.936 | 0.899 | 0.000  | 0.374  | 0.080  | 0.781 |       |        |       |       |
| <b>TP</b>                          | 0.304  | 0.253  | 0.533  | 0.639 | 0.467 | 0.368 | 0.087  | 0.137 | 0.370 | 0.475 | 0.518 | 0.169  | 0.020  | 0.100  | 0.319 | 0.427 |        |       |       |
| <b>VC</b>                          | 0.500  | -0.846 | 1.000  | 1.000 | 0.773 | 0.477 | 0.250  | 0.231 | 0.678 | 0.791 | 0.678 | 0.000  | -0.167 | -0.178 | 0.436 | 0.000 | -0.017 |       |       |
| <b>KHG</b>                         | -0.200 | 0.846  | 0.538  | 0.831 | 0.264 | 0.254 | -0.200 | 0.221 | 0.194 | 0.329 | 0.418 | 0.888  | 0.565  | 0.731  | 0.095 | 0.975 | 0.255  | 0.647 |       |
| <b>AVERAGE <math>F_{ST}</math></b> | 0.443  | 0.538  | 0.640  | 0.735 | 0.549 | 0.451 | 0.353  | 0.347 | 0.502 | 0.568 | 0.534 | 0.520  | 0.407  | 0.460  | 0.463 | 0.646 | 0.302  | 0.415 | 0.447 |
| <b>SD</b>                          | 0.286  | 0.359  | 0.327  | 0.243 | 0.293 | 0.165 | 0.283  | 0.173 | 0.276 | 0.295 | 0.246 | 0.369  | 0.291  | 0.329  | 0.209 | 0.374 | 0.183  | 0.354 | 0.306 |

DNG: Dangi, GIR: Gir, HR: Haryana, KGM: Kangayam, KNK: Kankrej, KHL: Khillar, KV: Krishna Valley, MG: Malnad Gidda, MWT: Mewati, NGR: Nagori, NMR: Nimari, ONG: Ongole, PNG: Punganur, RAT: Rathi, RSD: Red Sindhi, SW: Sahiwal, TP: Tharparkar, VC: Vechur; KHG: Kherigarh

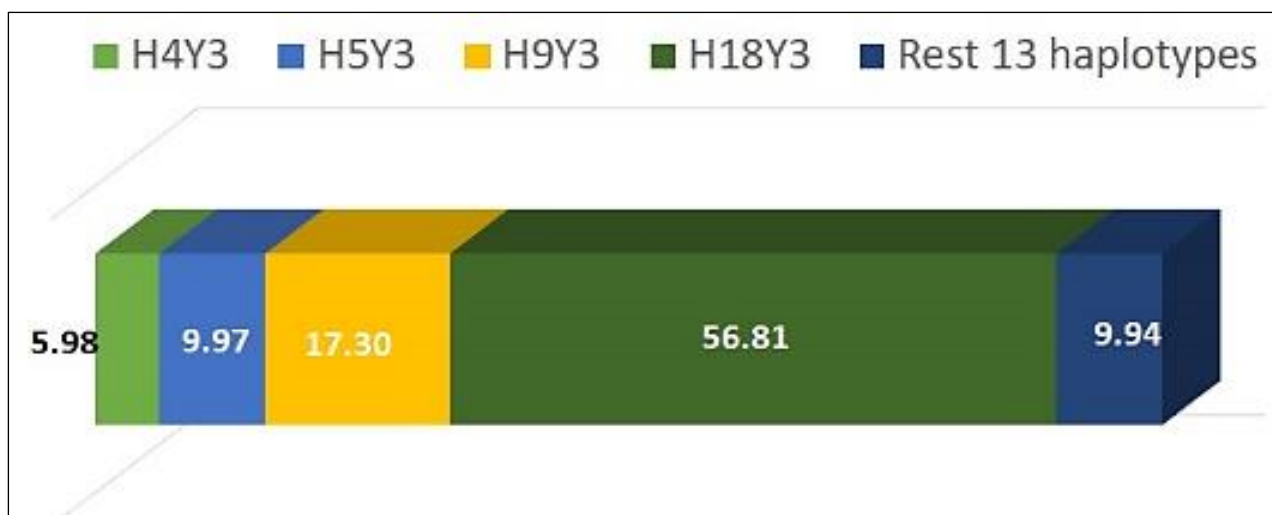

**Supplementary Fig. S1:** Major Y-chromosome haplotypes identified in Indian native cattle breeds.

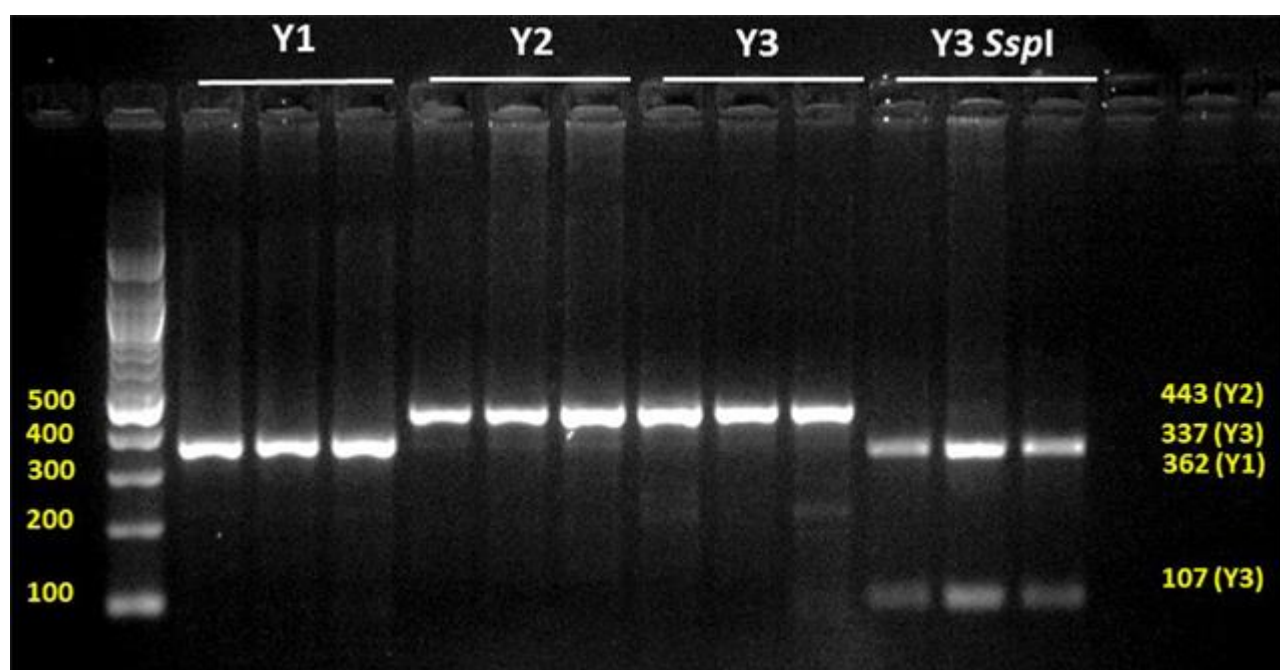

**Supplementary Fig. S2:** Analysis of USP9Y marker to differentiate Y1, Y2 and Y3 haplogroups using *Ssp* I PCR-RFLP. Y2 and Y3 display a fragment of 443 bp, while Y1 generates a fragment of 362 bp after PCR amplification. Upon digestion of 443 bp amplicon with *Ssp* I, Y3 yields two fragments of 337 bp and 107 bp due to the presence of variant cutting site for *Ssp* I, while Y2 yields a single fragment of 443 bp due to absence of cutting site for RE. The size marker is a 100 bp DNA ladder. DNA from HF, Jersey and Sahiwal bulls, already screened by allele-specific PCR and direct sequencing<sup>7</sup> with lineages Y1, Y2 and Y3 were used for the analysis of the USP9Y marker.

**a.**

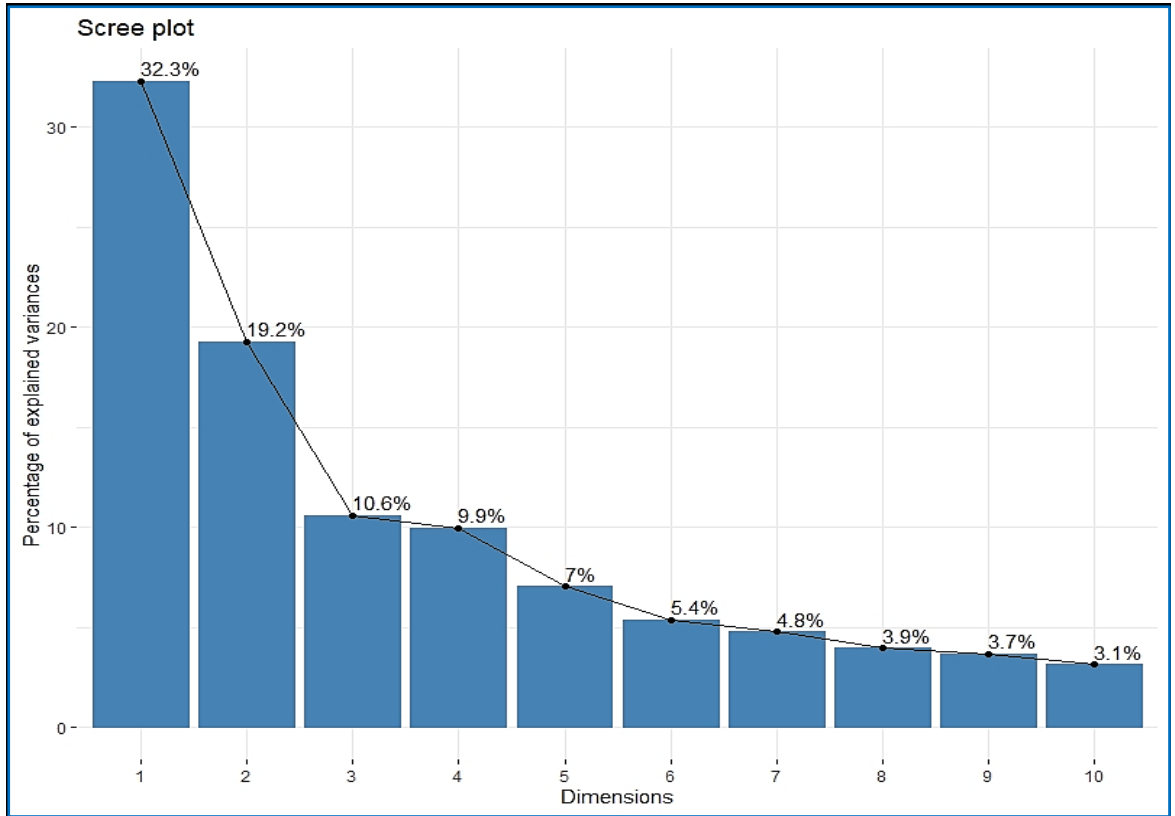

**b.**

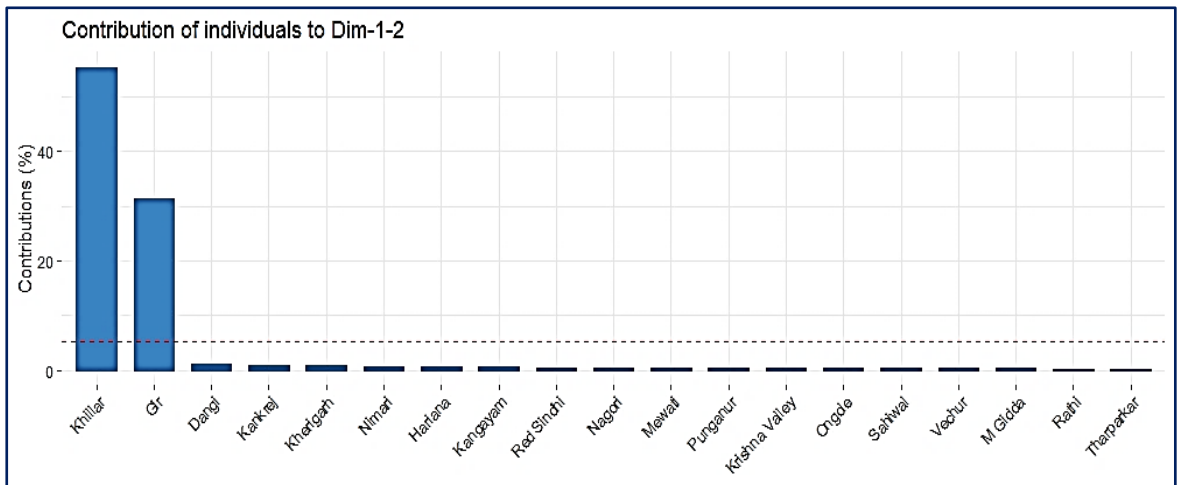



c.

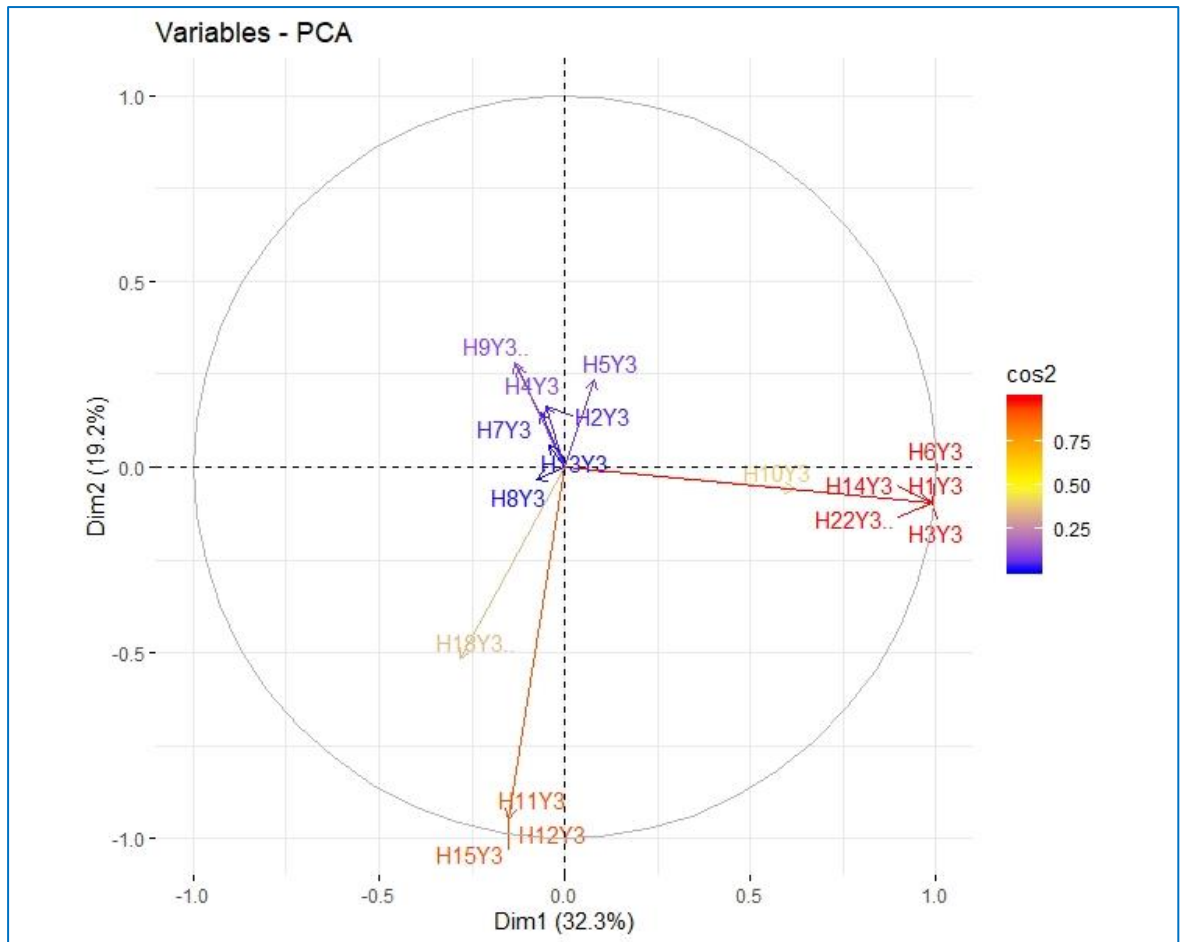

d.

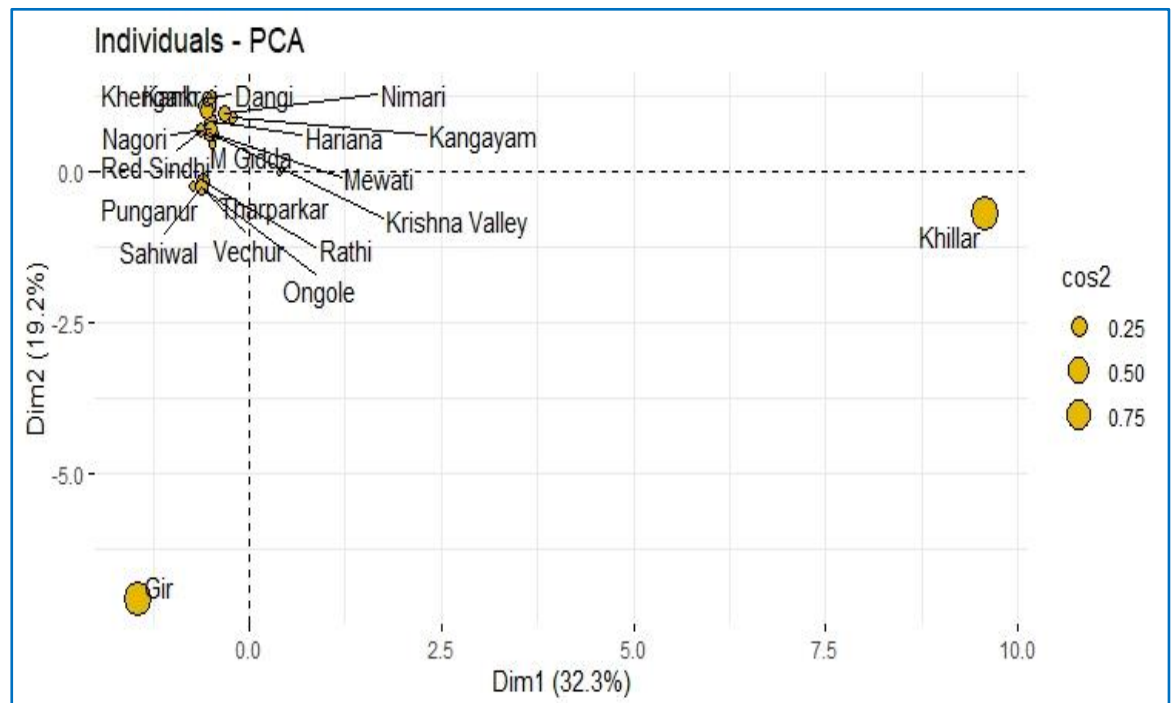

| e.     | Eigen value | Variance percent | Cumulative variance percent |
|--------|-------------|------------------|-----------------------------|
| Dim.1  | 5.49E+00    | 3.23E+01         | 32.27921                    |
| Dim.2  | 3.27E+00    | 1.92E+01         | 51.5286                     |
| Dim.3  | 1.80E+00    | 1.06E+01         | 62.12532                    |
| Dim.4  | 1.69E+00    | 9.94E+00         | 72.07015                    |
| Dim.5  | 1.20E+00    | 7.03E+00         | 79.10116                    |
| Dim.6  | 9.12E-01    | 5.36E+00         | 84.4645                     |
| Dim.7  | 8.12E-01    | 4.77E+00         | 89.23863                    |
| Dim.8  | 6.71E-01    | 3.95E+00         | 93.18647                    |
| Dim.9  | 6.25E-01    | 3.68E+00         | 96.86374                    |
| Dim.10 | 5.33E-01    | 3.14E+00         | 100                         |

**Supplementary Fig. S3:** PCA analysis based on Y-chromosome haplotype frequencies of all breeds. a. Contribution of PCs; b. Contribution of individuals (breeds) to dimension 1 and 2; c. Contribution of haplotypes; d. Contribution of breeds; e. Eigen values; M Gidda: Malnad Gidda.

**a.**

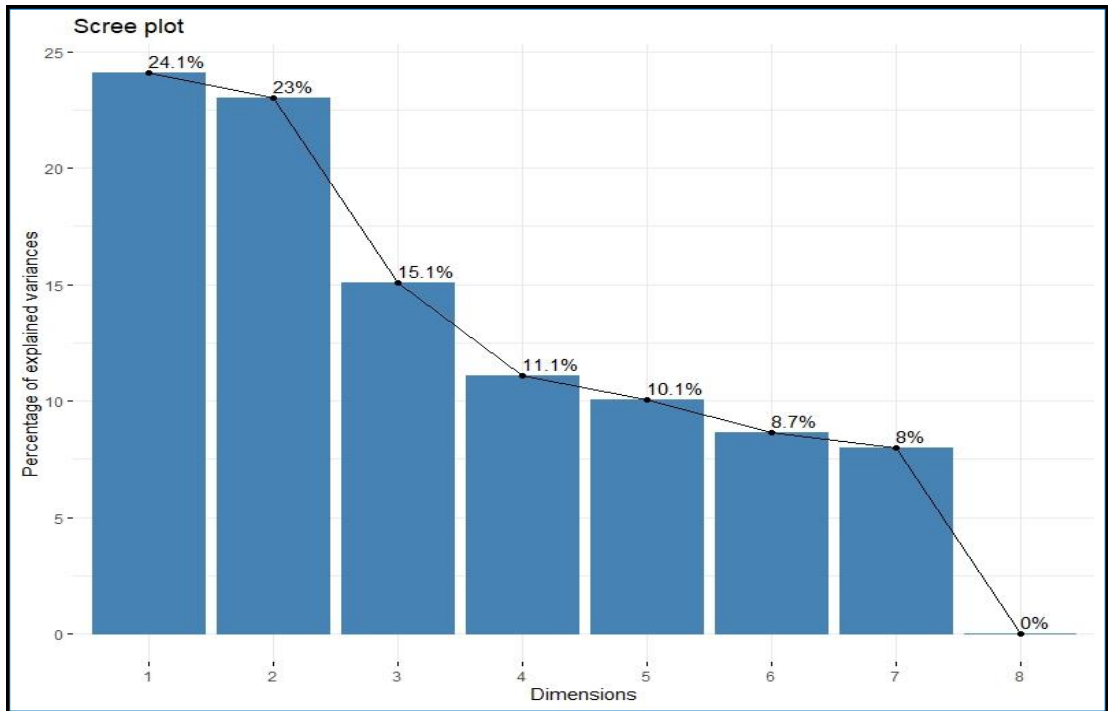

**b.**

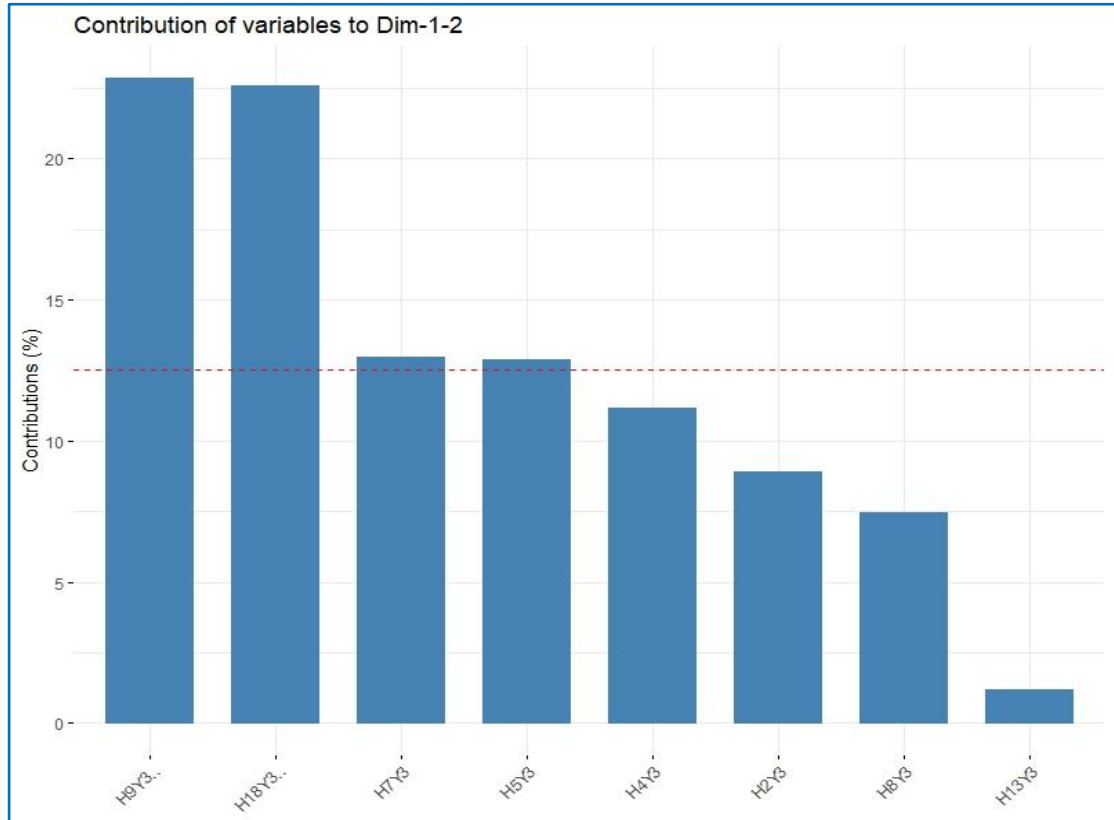

c.

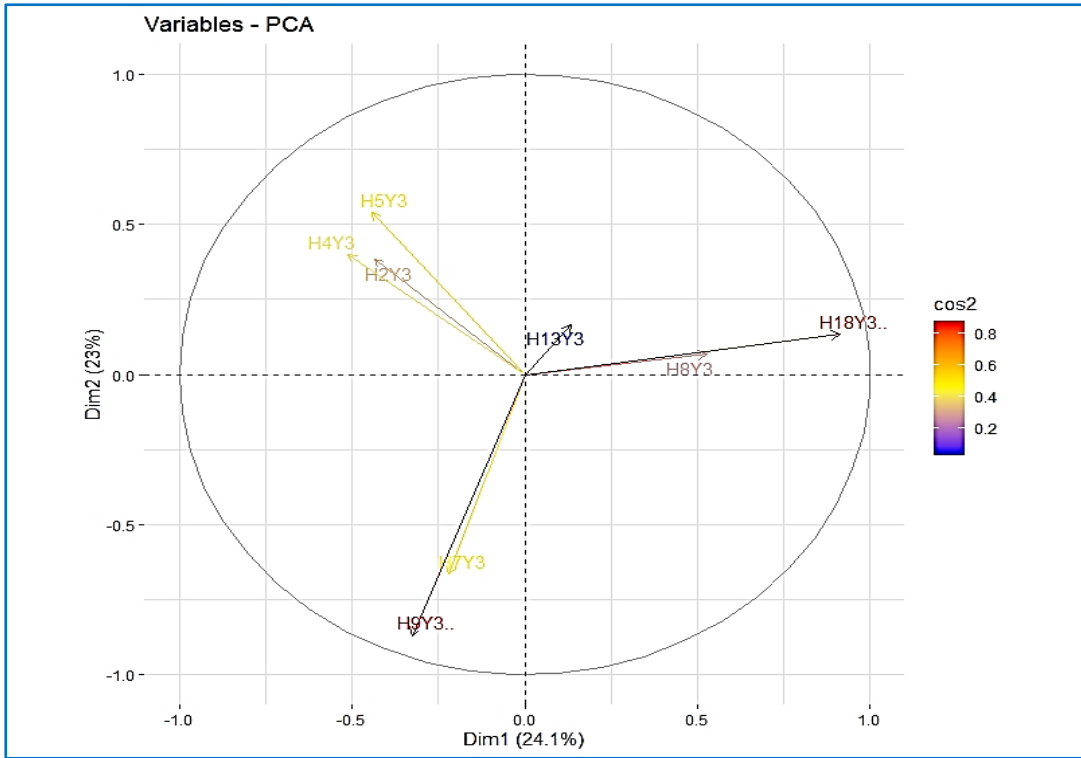

d.

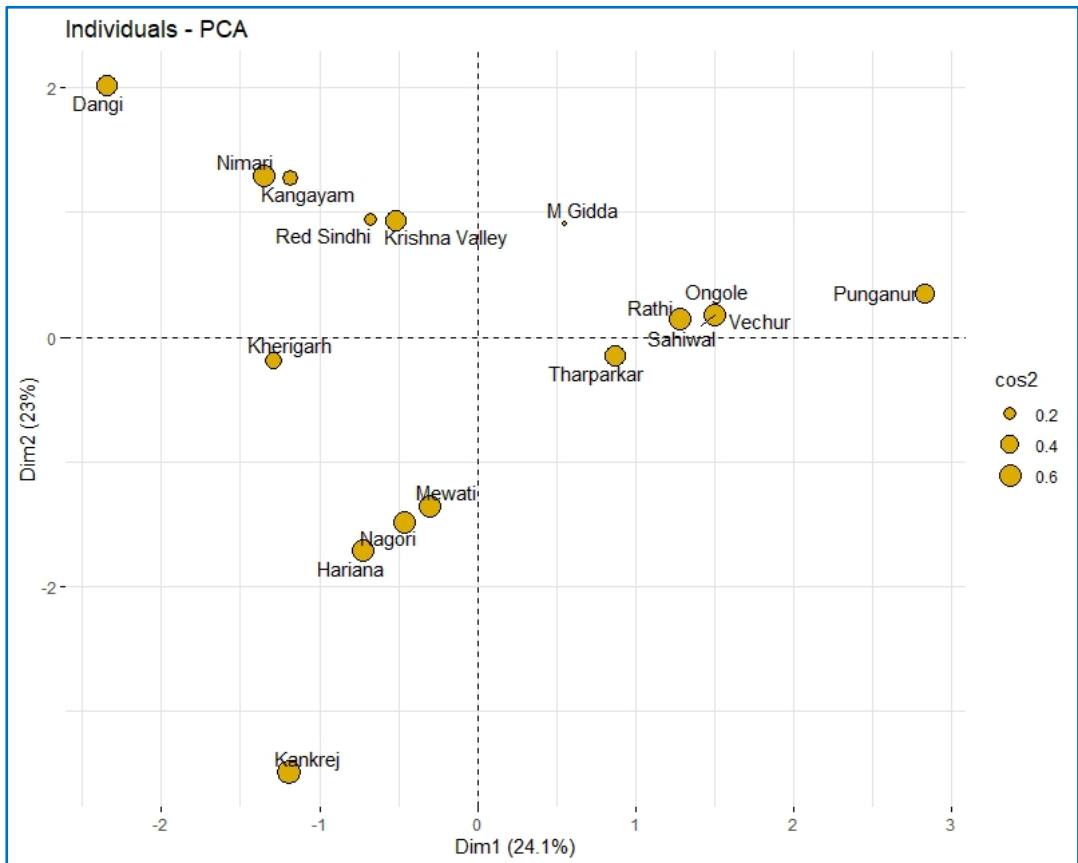

| e.    | Eigen value | Variance percent | Cumulative variance percent |
|-------|-------------|------------------|-----------------------------|
| Dim.1 | 1.927892    | 24.09866         | 24.09866                    |
| Dim.2 | 1.840743    | 23.00929         | 47.10794                    |
| Dim.3 | 1.2058      | 15.0725          | 62.18045                    |
| Dim.4 | 0.886796    | 11.08495         | 73.2654                     |
| Dim.5 | 0.80549     | 10.06863         | 83.33402                    |
| Dim.6 | 0.692652    | 8.658148         | 91.99217                    |
| Dim.7 | 0.640018    | 8.000221         | 99.99239                    |
| Dim.8 | 0.000609    | 0.007607         | 100                         |

**Supplementary Fig. S4:** PCA analysis based on Y-chromosome haplotype frequencies of remaining breeds after removal of Gir and Khillar. a. Contribution of PCs; b. Contribution of individuals (breeds) to Dimension 1 and 2; c. Contribution of haplotypes; d. Contribution of breeds; e. Eigen values; M Gidda: Malnad Gidda.

## Online Supplementary References

1. Kappes, S. M. *et al.* A second-generation linkage map of the bovine genome. *Genome Res.* **7**, 235–249 (1997).
2. Bishop, M. D. *et al.* A genetic linkage map for cattle. *Genetics* **136**, 619–639 (1994).
3. Götherström, A. *et al.* Cattle domestication in the Near East was followed by hybridization with aurochs bulls in Europe. *Proc. Biol. Sci.* **272**(1579), 2345–2350 (2005).
4. Liu, W. S. *et al.* Bovine Y chromosome microsatellite polymorphisms. *Cytogenet. Genome Res.* **102**(1-4), 53–58 (2003).
5. Ginja, C. *et al.* The genetic ancestry of American creole cattle inferred from uniparental and autosomal genetic markers. *Sci. Rep.* **9**, 1–16 (2019).
6. Ginja, C. *et al.* Origins and genetic diversity of New World Creole cattle: Inferences from mitochondrial and Y chromosome polymorphisms. *Anim. Genet.* **41**(2), 128–141 (2010).
7. Kumar, S. *et al.* Y-chromosome variation in Indian native cattle breeds and crossbred population. *Indian J. Anim. Res.* **51**, 1–7 (2017).
